# Supplementary material
Source: Springer Nature journal article supplement (https://www.springermedizin.de/resource/supplementary/12879_2013_3097_MOESM1_ESM.pdf/9446002)

**A**

Proportion with hepatotoxicity (any grade)

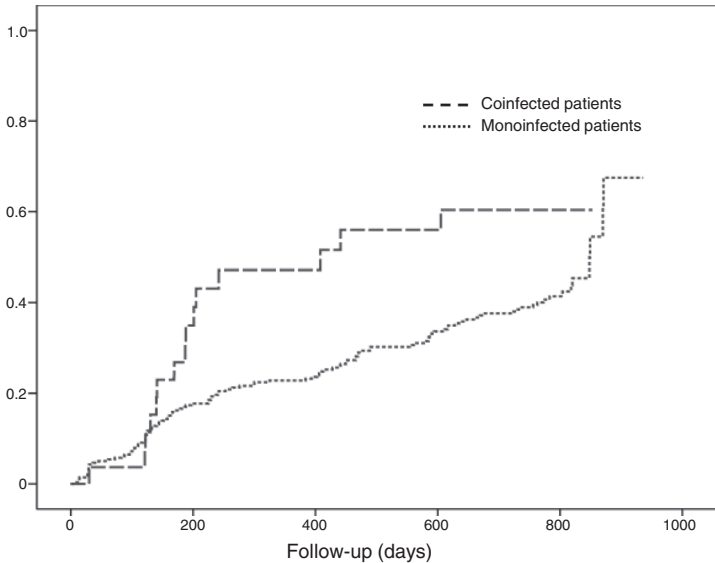**B**

Proportion with hepatotoxicity (grade &gt; 2)

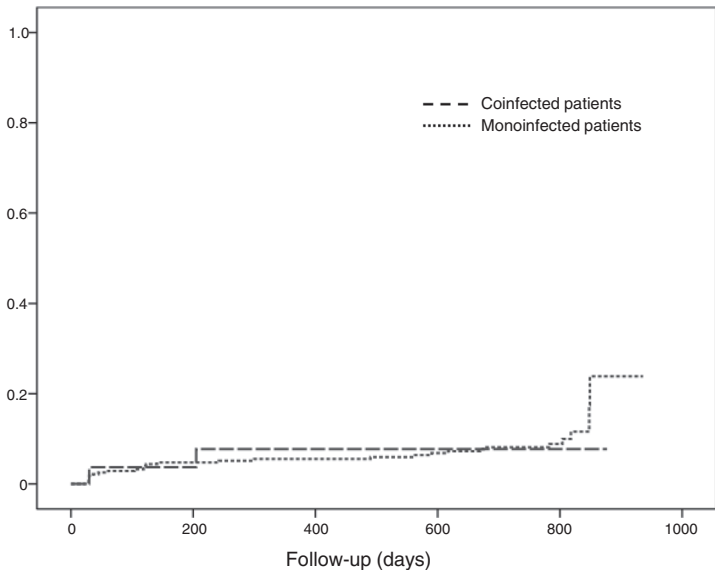

Supplement: MOESM1 [file 9446002]
